# Supplementary material for: Open Source Software to Control Bioflo Bioreactors
Source: PubMed Central journal article supplement (PMC3965399; doi:10.1371/journal.pone.0092108), 2014-03-25
Supplement: pone.0092108.s001.pdf [file pone.0092108.s001.pdf]

# Open Source Software to Control Bioflo Bioreactors

David A Burdge and Igor GL Libourel

## SUPPLEMENT

Figure 1: Patch cable to connect a Bioflo machine to a serial port

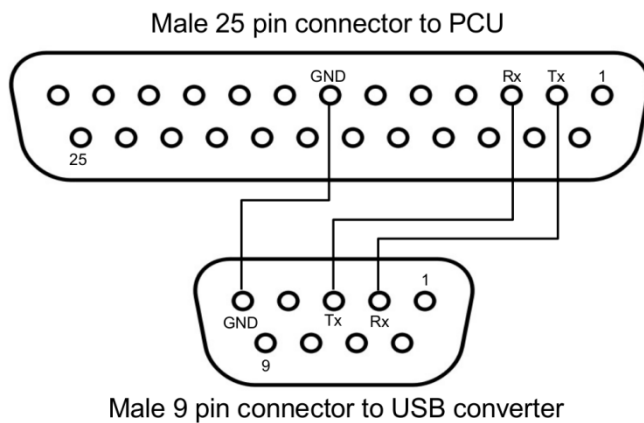

The Bioflo110 primary control unit (PCU) is equipped with a 25 pin connector used for communicating with a personal computer. The connector was configured for RS-232 communication standard. The 25 pin connector was converted to a 9 pin connector: the Tx, Rx and GND pins of the 25 pin connector were soldered to the Rx, Tx and GND pins of the 9 pin connector.

Figure 2: Communication command structure

**I Request Message**

| Type                   | Format      | Response (Header)        |
|------------------------|-------------|--------------------------|
| Get Loop Names         | (MD#)RA(CR) | Loop(Sp)(Sp)(Sp)(Sp)(Sp) |
| Get Current Values     | (MD#)RC(CR) | Cur:V value              |
| Get Setpoints          | (MD#)RD(CR) | OP Points                |
| Get Controller Outputs | (MD#)RE(CR) | Output(Sp)%(Sp)          |
| Get Control Modes      | (MD#)RJ(CR) | Control(Sp)(Sp)          |
| Get Units              | (MD#)RL(CR) | Main(Sp)Unit             |

**II Command Message**

| Type                     | Format (Header)                | Response |
|--------------------------|--------------------------------|----------|
| Change Setpoints         | MS(Sp)(Sp)(Sp)(Sp)(Sp)(Sp)(Sp) | (MD#)ACK |
| Change Controller Output | MO(Sp)(Sp)(Sp)(Sp)(Sp)(Sp)(Sp) | (MD#)ACK |

**III Request Response & Command Message Formats**

|       |                   |                    |      |     |                     |      |      |
|-------|-------------------|--------------------|------|-----|---------------------|------|------|
| (MD#) | Header<br>9 chars | Field 1<br>6 chars | (Sp) | ... | Field 10<br>6 chars | (Sp) | (CR) |
|-------|-------------------|--------------------|------|-----|---------------------|------|------|

*(MD#) = Multidrop ID Number, (CR) = Carriage Return, (Sp) = Space, ACK = Acknowledgement character*

The AFS communications protocol uses a master-slave model where the PC is the master and the PCU is the slave. All communications are initiated by the PC, requesting a response from the PCU. Messages to/from the PCU are preceded by a multidrop number that specifies the vessel control system. The PC sends two types of messages: requests and commands. The request messages prompt the PCU to respond with specific information. A list of request types are shown in the first column of table I. Request message formats are shown in the second column of table I. The PCU responds to request messages with character strings formatted according to table III with response headers shown in third column of table I. The command messages prompt the PCU to change a setpoint or controller output value. The messages are formatted according to table III with format headers shown in the second column of table II.

## Protocol execution:

Detail of an example script for the **Time Protocol VI** (full executable script is included as an additional supplement).

|        |          |      |
|--------|----------|------|
| Temp 1 | 37.13084 | 60   |
| Temp 1 | 37.26132 | 120  |
| Temp 1 | 37.39109 | 180  |
| Temp 1 | 37.51978 | 240  |
| Temp 1 | 37.64705 | 300  |
| Temp 1 | 37.77254 | 360  |
| Temp 1 | 37.89592 | 420  |
| Temp 1 | 38.01684 | 480  |
| Temp 1 | 38.13498 | 540  |
| Temp 1 | 38.25    | 600  |
| Temp 1 | 38.3616  | 660  |
| Temp 1 | 38.46946 | 720  |
| Temp 1 | 38.5733  | 780  |
| Temp 1 | 38.67283 | 840  |
| Temp 1 | 38.76777 | 900  |
| Temp 1 | 38.85786 | 960  |
| Temp 1 | 38.94286 | 1020 |
| Temp 1 | 39.02254 | 1080 |
| Temp 1 | 39.09668 | 1140 |
| Temp 1 | 39.16506 | 1200 |
| Temp 1 | 39.22752 | 1260 |
| Temp 1 | 39.28386 | 1320 |
| Temp 1 | 39.33395 | 1380 |
| Temp 1 | 39.37764 | 1440 |
| Temp 1 | 39.41481 | 1500 |

Each line contains: 1) the controlled parameter; 2) the parameter setpoint, and; 3) the execution time relative to the start of protocol execution. All parameters, including from dynamically loaded plugins can be programmed in this fashion.

Example script for the **Python Protocol VI** (full executable script is included as an additional supplement).

```
import math
TempSetpoint=37.0+2.5*math.sin(2.0*math.pi*(CurrentTime-StartTime)*(1.0/7200.0))
```

The python protocol VI uses an open source library called LabPython to interface with the Python scripting language. By utilizing the Python language conditional logic can be implemented in protocols.
